# Supplementary material
Source: PubMed Central journal article supplement (PMC4394258)
Supplement: pnas.201423768SI.pdf [file pnas.201423768SI.pdf]

# Supporting Information

Zhang et al. 10.1073/pnas.1423768112

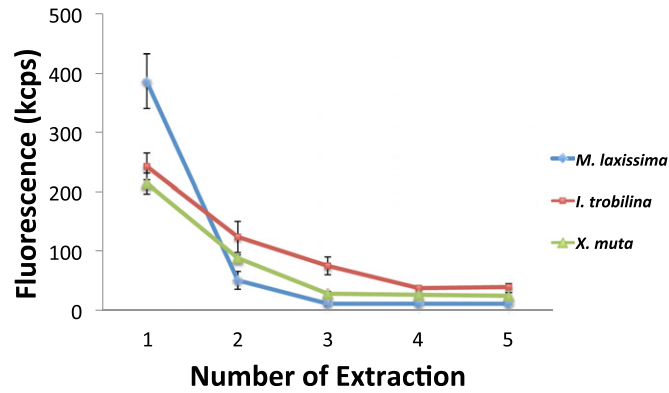

Fig. S1. Fluorescence reading from five successive polyP extractions from lyophilized samples of three sponge species, *X. muta* (green), *I. strobilina* (red), and *M. laxissima* (blue), stained with DAPI in triplicate. Error bars indicate  $\pm 1$  SD.

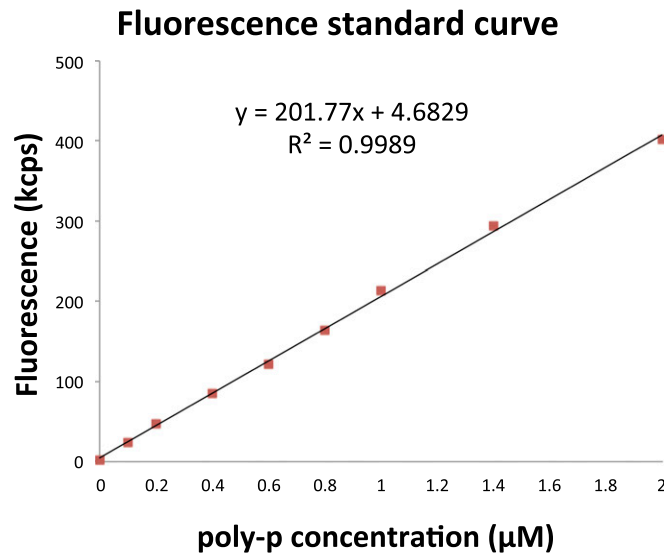

Fig. S2. Standard curve of the fluorescence signal vs. the concentration of polyP calculated in orthophosphate equivalents. kcps, kilocounts per second.

**Table S1. Representative clones of *ppk* genes found in the sponge *I. strobilina* and their closest Blastx sequence matches**

| <i>ppk</i> gene clones<br>(accession no.) | Closest cultivated microorganism,<br>accession no. (% identity) and names | Phylogenetic classification and<br>biogeochemical cycles involved |
|-------------------------------------------|---------------------------------------------------------------------------|-------------------------------------------------------------------|
| IS-ppk-M2 (KP233195)                      | WP_006516974.1 (78)<br><i>Leptolyngbya</i> sp. PCC 7375                   | Nitrogen-fixing cyanobacteria                                     |
| IS-ppk-M3 (KP233196)                      | WP_029066418.1 (90)<br><i>Labrenzia</i> sp. DG1229                        | Phototrophic alpha-Proteobacteria                                 |
| IS-ppk-M6 (KP233197)                      | AHM02737.1 (84)<br><i>Roseibacterium elongatum</i> DSM19469               | Phototrophic alpha-Proteobacteria                                 |
| IS-ppk-M7 (KP233198)                      | WP_002682470 (52)<br><i>Beggiatoa alba</i>                                | Sulfide oxidation gamma-Proteobacteria                            |
| IS-ppk-M8 (KP233199)                      | WP_010943936.1 (56)<br><i>Geobacter sulfurreducens</i>                    | Sulfur reducing delta-Proteobacteria                              |
